# Supplementary material for: Targeting focal adhesion kinase boosts immune response in KRAS/LKB1 co-mutated lung adenocarcinoma via remodeling the tumor microenvironment
Source: Springer Nature journal article supplement (doi:10.1186/s40164-023-00471-6), 2024-01-30

**A**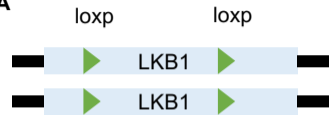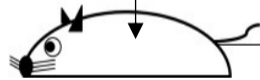 $KRAS^{G12D}LKB1^{loxP/loxP}$ 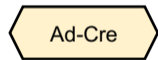

intra-nasal

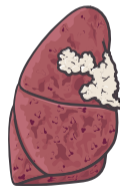

dissect

sorting

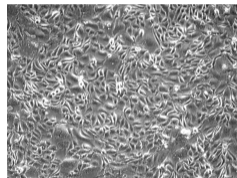 $KRAS^{G12D}LKB1^{-/-}$ **B**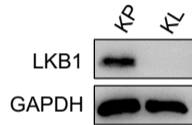

Supplement: MOESM3 [file 26677956]
