# Supplementary material for: Targeting focal adhesion kinase boosts immune response in KRAS/LKB1 co-mutated lung adenocarcinoma via remodeling the tumor microenvironment
Source: Springer Nature journal article supplement (doi:10.1186/s40164-023-00471-6), 2024-01-30

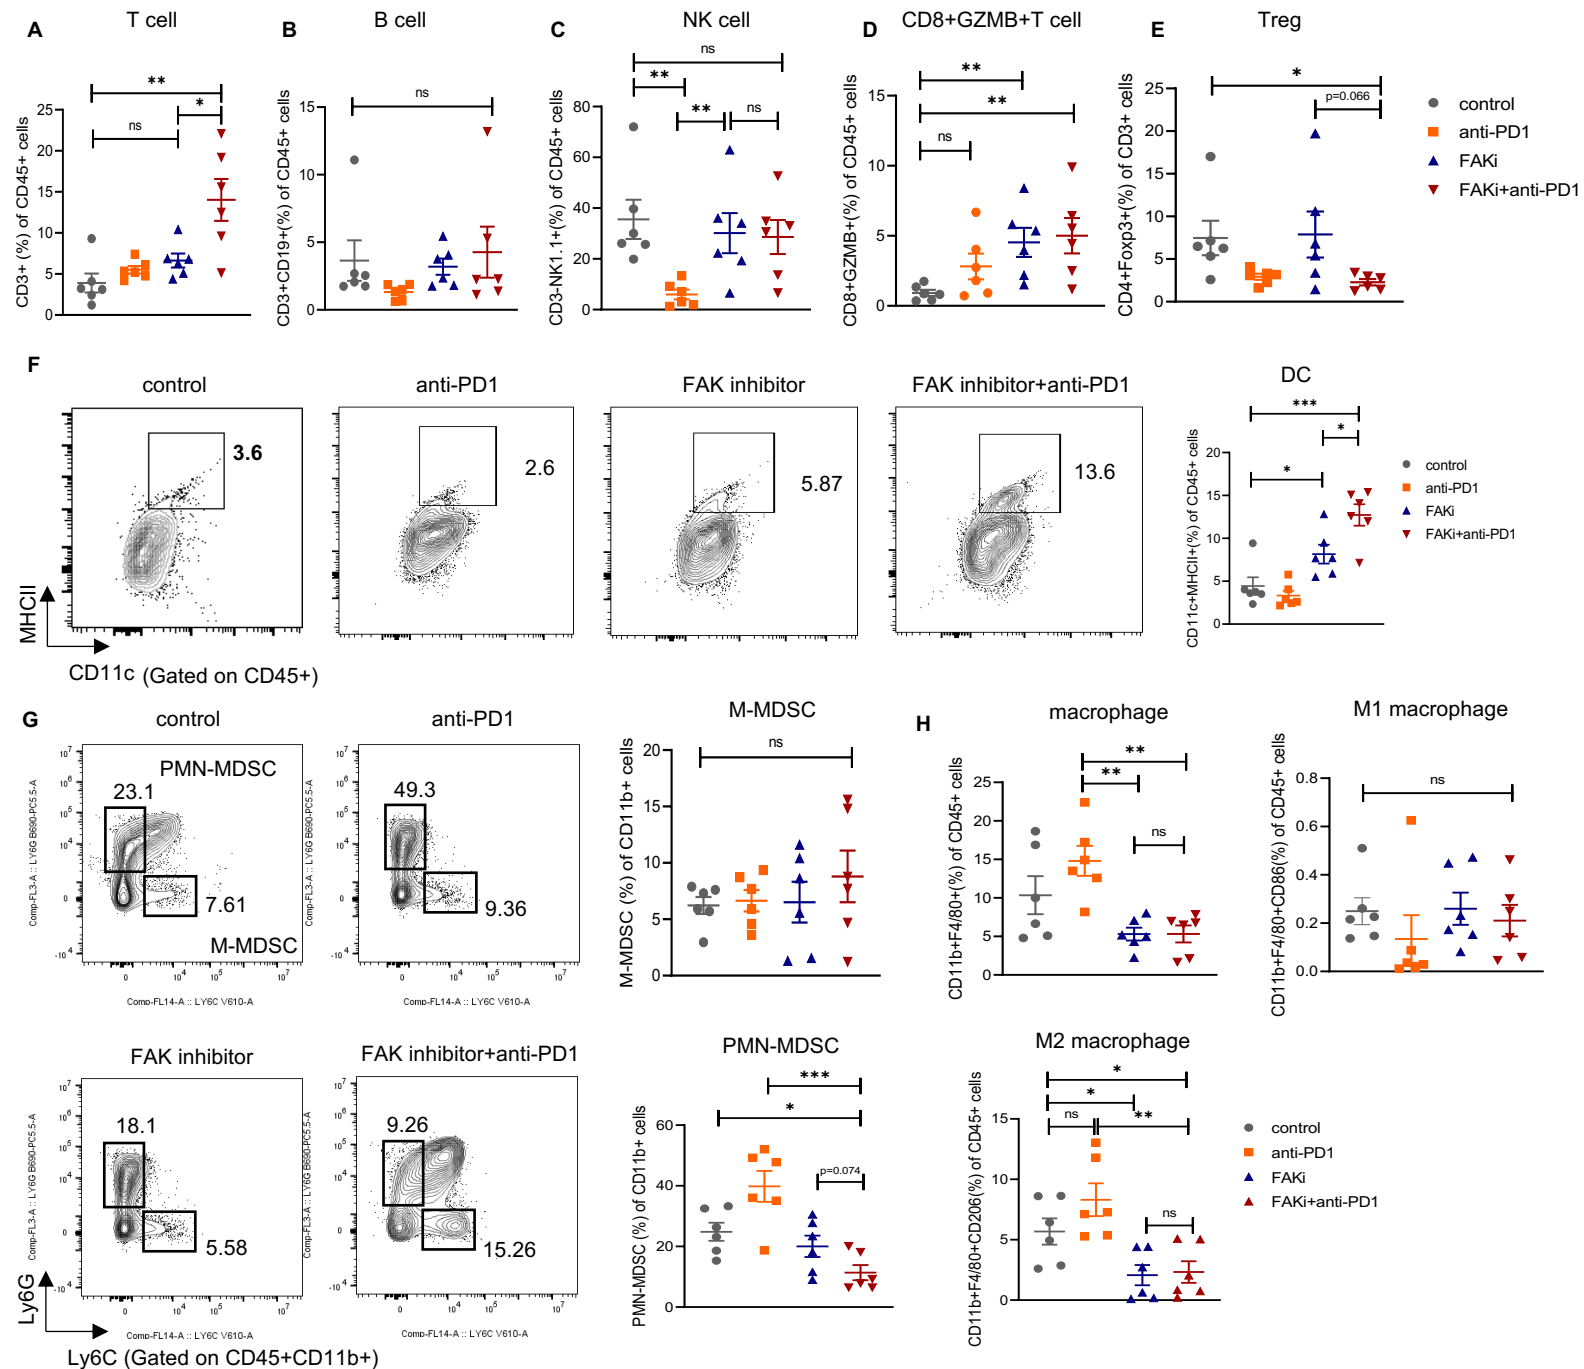

Supplement: MOESM10 [file 26677956]
